# Supplementary material for: Age-dependent sex differences in calcium and phosphate homeostasis
Source: PubMed Central journal article supplement (PMC8052581; doi:10.1530/ec-20-0509), 2021-02-04

Supplemental figure: splines for serum phosphate and calcium levels in men and women, for each year sampled

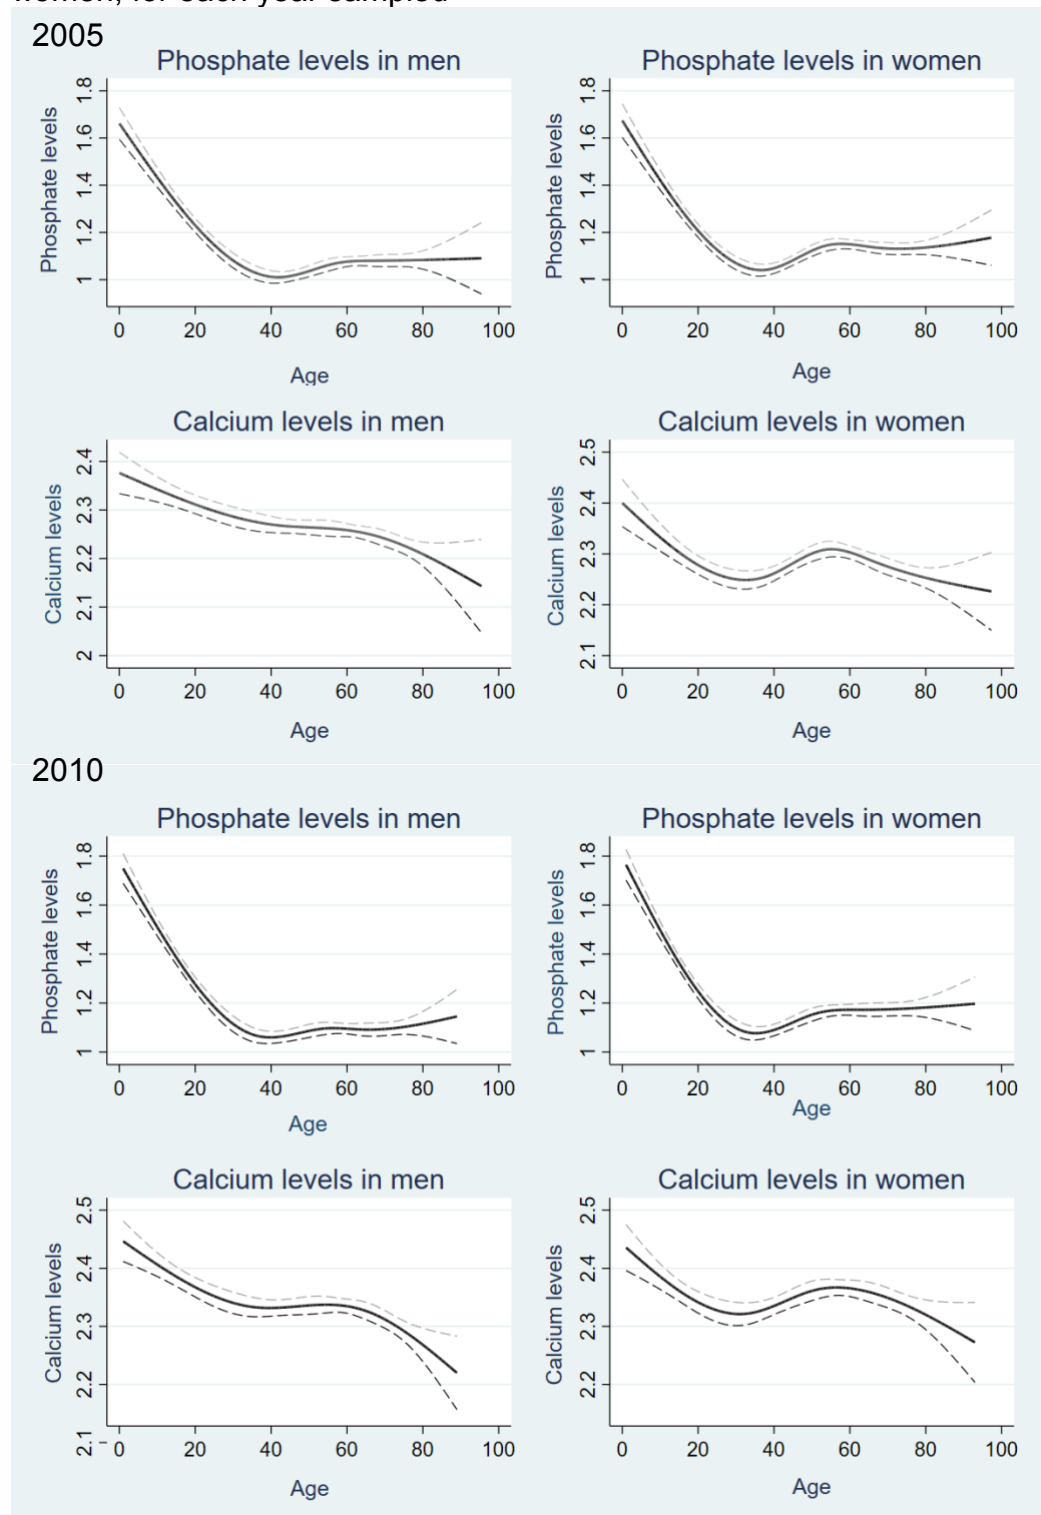

2014

Phosphate levels in men

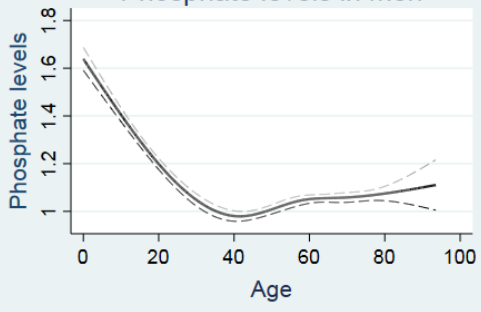

Phosphate levels in women

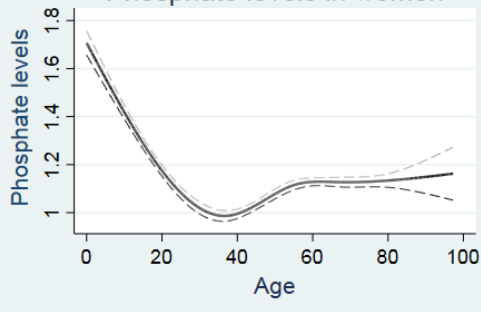

Calcium levels in men

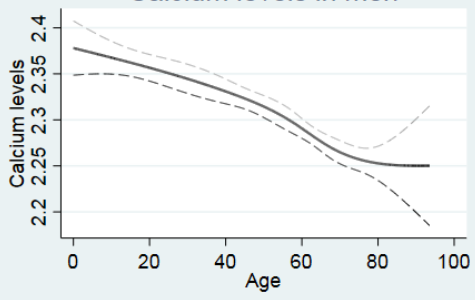

Calcium levels in women

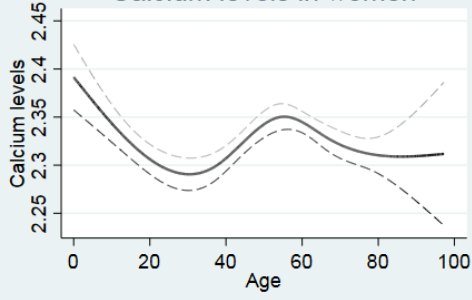

Supplement: supplementary_figure_1.pdf [file supplementary_figure_1.pdf]
